# Supplementary material for: ROCKII inhibition promotes the maturation of human pancreatic beta-like cells
Source: PubMed Central journal article supplement (PMC5563509; doi:10.1038/s41467-017-00129-y), 2017-08-21
Supplement: 41467_2017_129_MOESM1_ESM.pdf [file 41467_2017_129_MOESM1_ESM.pdf]

File name: Supplementary Information

Description: Supplementary Figures and Supplementary Tables.

File name: Peer Review File

Description:

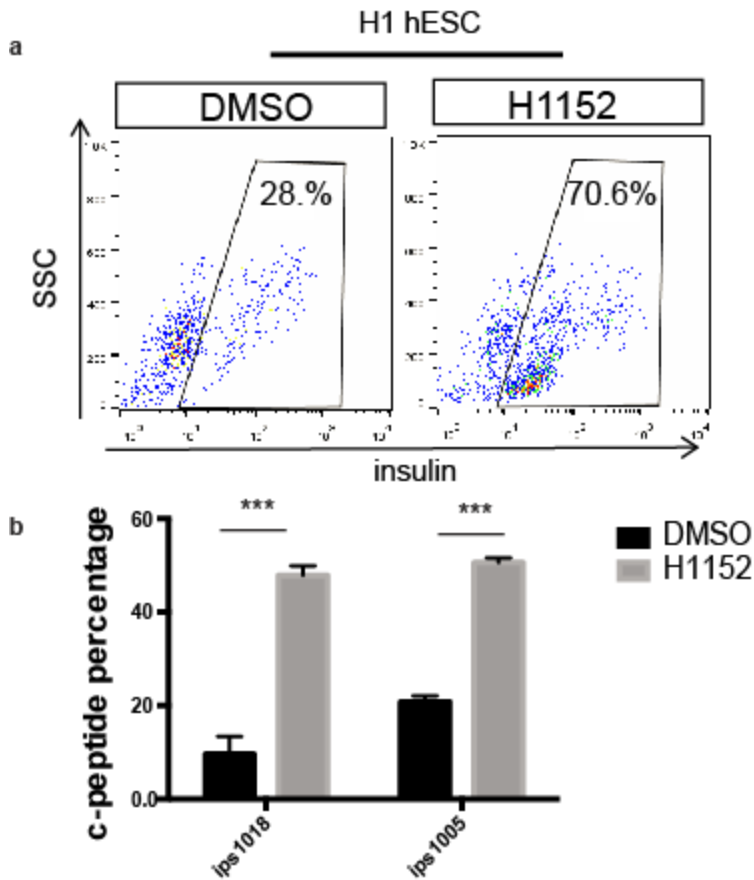

**Supplementary Figure 1. The effect of H1152 on different hESC/iPSC lines.**

Related with Figure 1. (a) Intracellular FCM to detect the expression of insulin in DMSO or H1152 treated H1-derived cells.

(b) Quantification of the percentage of c-peptide<sup>+</sup> cells of DMSO or H1152 treated cells derived from 2 different iPSC lines. *p* values were calculated by unpaired two-tailed Student's *t*-test. \*\*\**p*<0.001. N=3-6 independent biological replicates. Error bar is SEM.

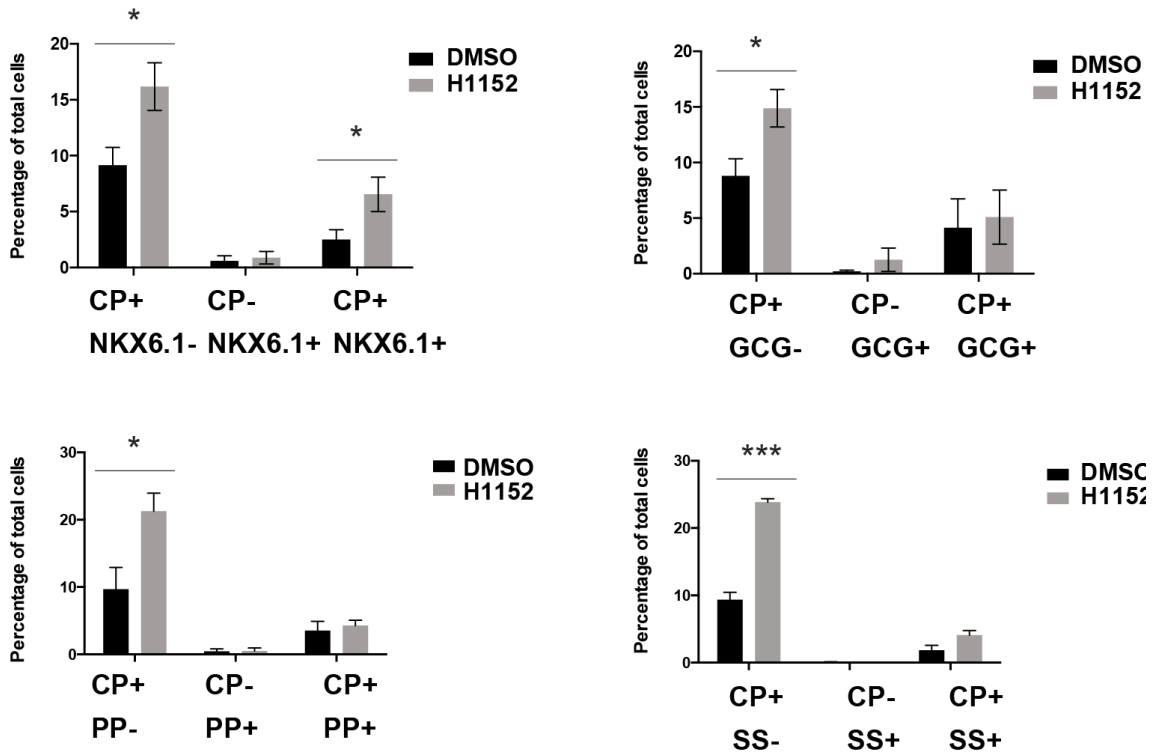

**Supplementary Figure 2. H1152 promotes the maturation of hESC-derived glucose-responding cells.** Related with Figure 2. Quantification of the intracellular FCM of H1152-treated vs DMSO-treated hESC-derived glucose-responding cells in Fig. 2d. *p* values were calculated by unpaired two-tailed Student's *t*-test. \**p*<0.05, \*\**p*<0.01. N=3-6 independent biological replicates. Error bar is SEM.

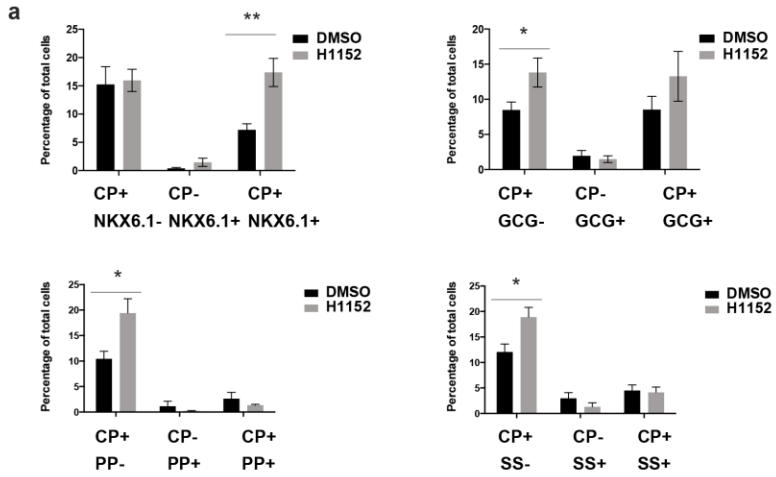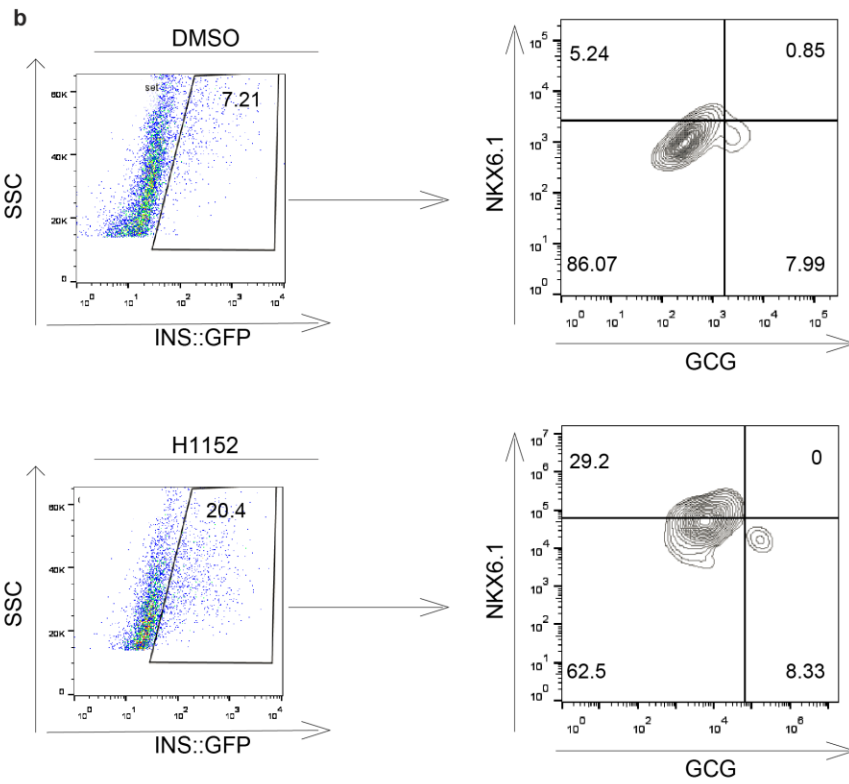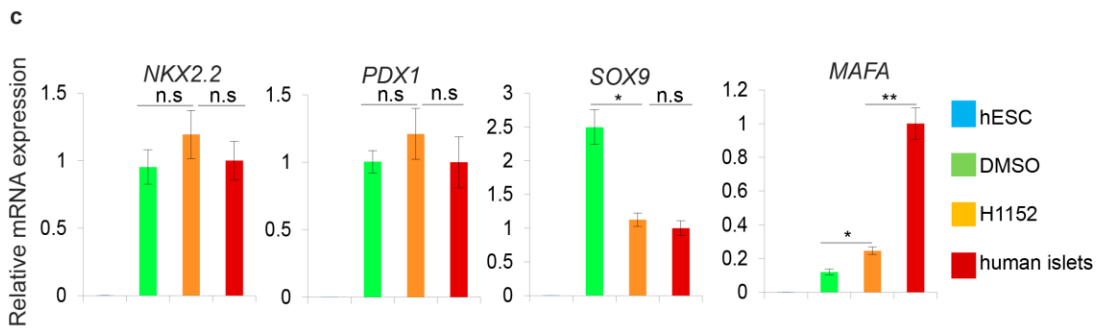

**Supplementary Figure 3. H1152 promotes the generation and maturation of hESC-derived glucose-responding cells in the presence of a distinct protocol.** Related with Figure 2. (a) Intracellular FCM quantification for H1152-treated vs DMSO-treated hESC-derived glucose-responding cells in Fig. 4c. N=3-6 independent biological replicates (b) NKX6.1 and GCG staining of purified INS-GFP<sup>+</sup> cells in H1152- and DMSO- treated population. (c) qRT-PCR analysis of H1152-treated or DMSO-treated cells. Scale bar: 100  $\mu$ m. The data were normalized to primary human islets. N=6-8 independent biological replicates. *p* values were calculated by unpaired two-tailed Student's t-test. \**p*<0.05, \*\**p*<0.01. Error bar is SEM.

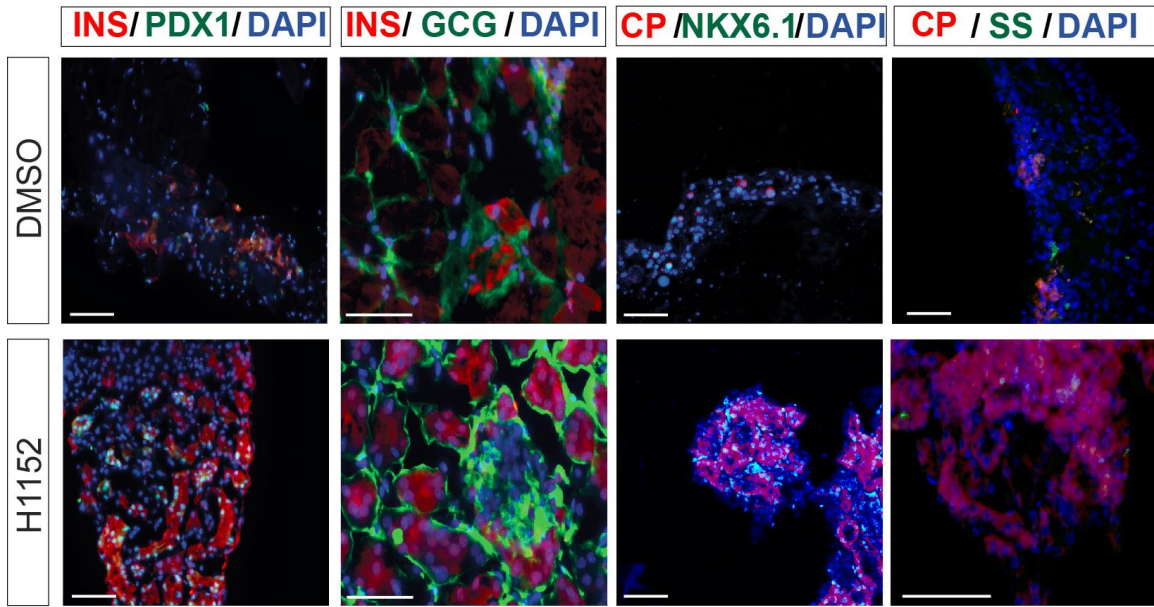

**Supplementary Figure 4. Immunohistochemistry analysis of grafts of H1152-treated or DMSO-treated cells.** Related with Figure 5. Scale bar: 100  $\mu$ m. GCG: glucagon; SS: somatostatin; CP:c-peptide.

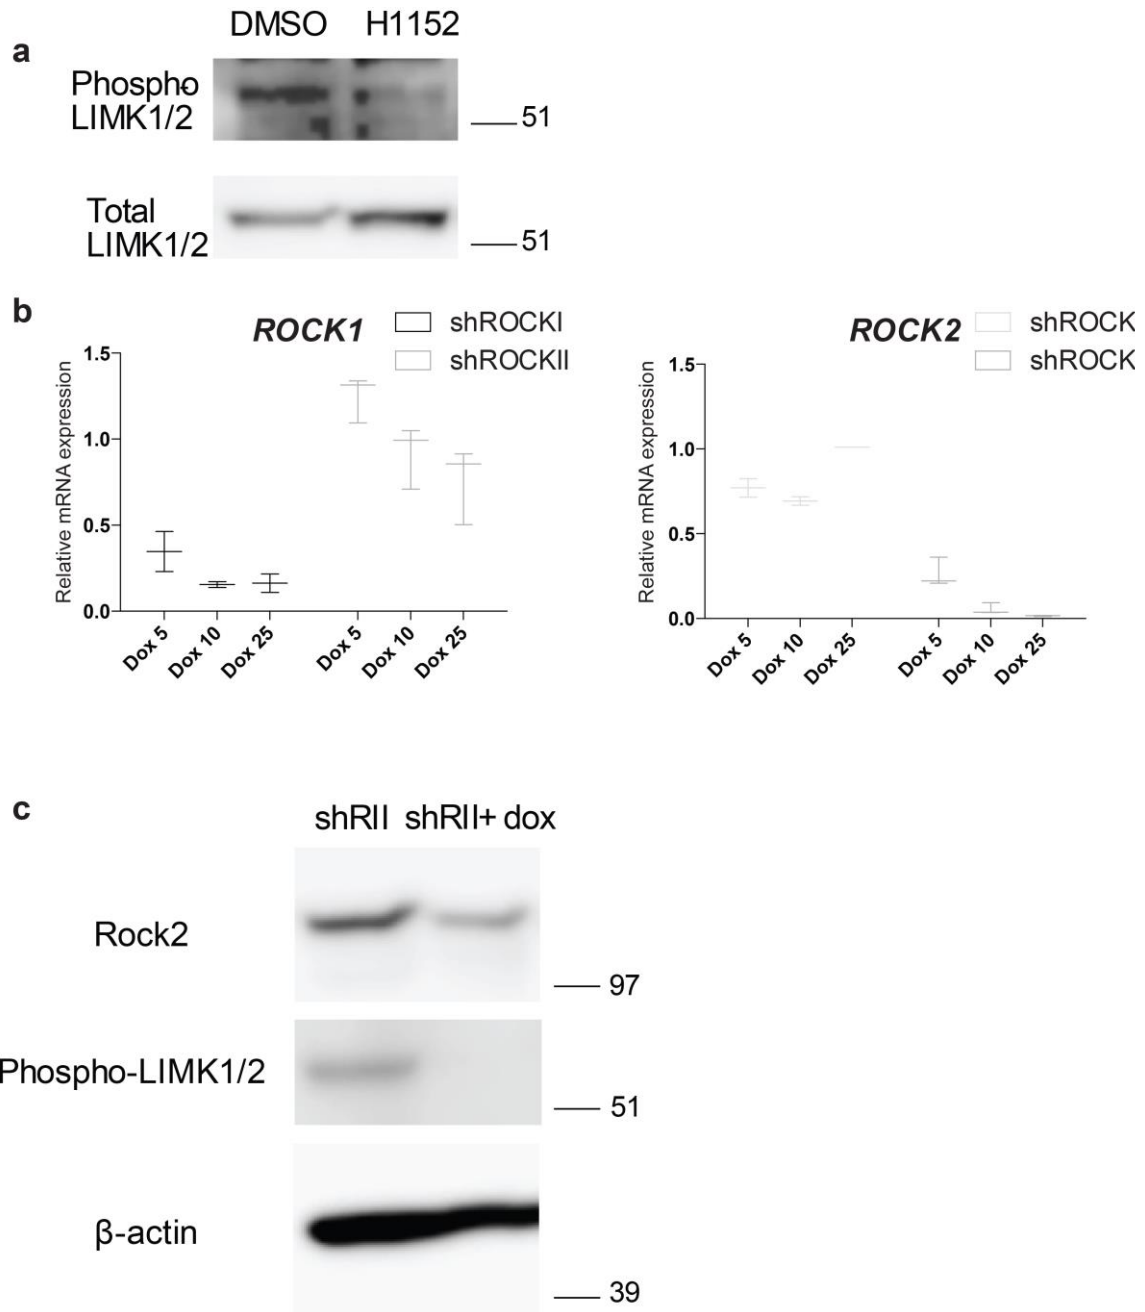

**Supplementary Figure 5. ROCKII, but not ROCK I, inhibition promotes the generation and maturation of glucose-responding cells.** Related with Figure 6. (a) Western blotting analysis of lysates from HUES8-derived cells at 48 hours after DMSO or H1152 (10  $\mu$ M) treatment. (b) qRT-PCR to validate the knockdown efficiency in hESCs at 5, 10 or 25  $\mu$ g/mL dox concentrations. N=3 independent biological replicates. Error bar is SEM. (c) Western blotting analysis of lysates from HUES8-derived cells at 48 hours after 10  $\mu$ g/mL doxycycline treatment.

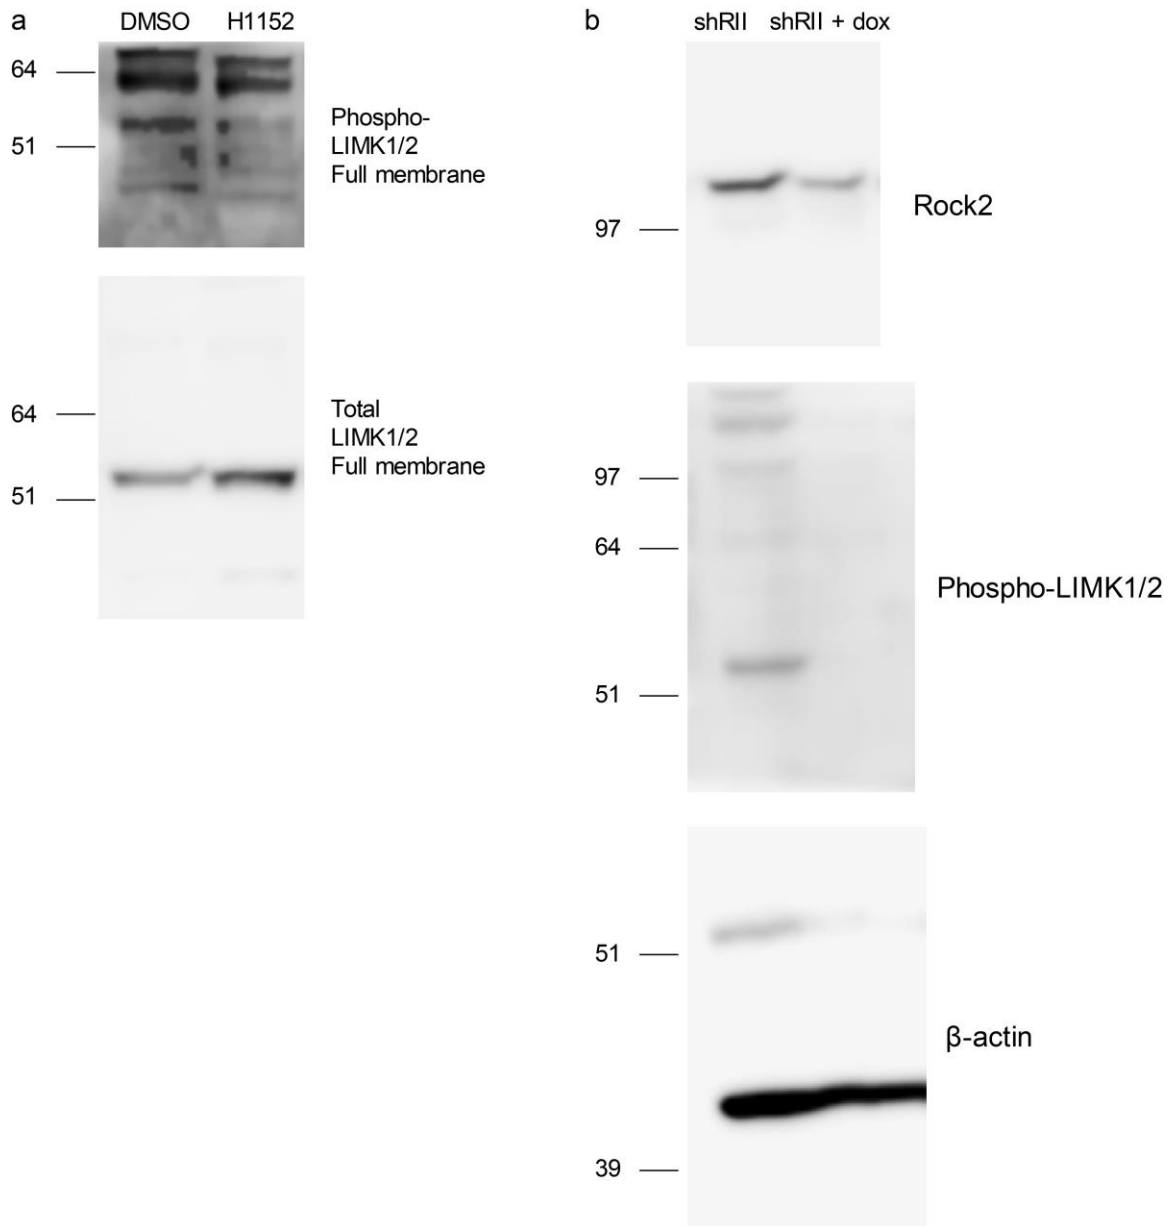

**Supplementary Figure 6. Uncropped western blots of Supplementary Figure 5a (a) and Supplementary Figure 5c (b).**



**Supplementary Table 1.** Related with Figure 1. Primary screening data

| <b>Category</b>   | <b>Parameter</b>                         | <b>Description</b>                                                                                               |
|-------------------|------------------------------------------|------------------------------------------------------------------------------------------------------------------|
| Assay             | Type of assay                            | Cell-based                                                                                                       |
|                   | Target                                   | Pancreatic beta cell generation and maturation                                                                   |
|                   | Primary measurement                      | Percentage of insulin+ cells                                                                                     |
|                   | Key reagents                             | Insulin antibody                                                                                                 |
|                   | Assay protocol                           | See the section of experimental procedures.                                                                      |
|                   | Additional comments                      |                                                                                                                  |
| Library           | Library size                             | More than 4000 compounds                                                                                         |
|                   | Library composition                      | FDA approved drugs, kinase inhibitors, signaling pathway regulators                                              |
|                   | Source                                   | Sigma LOPAC library, Microsource Spectrum library                                                                |
|                   | Additional comments                      |                                                                                                                  |
| Screen            | Format                                   | 384-well plate                                                                                                   |
|                   | Concentration(s) tested                  | 10 $\mu$ M and 1 $\mu$ M compounds                                                                               |
|                   | Plate controls                           | None                                                                                                             |
|                   | Reagent/ compound dispensing system      | Multidrop                                                                                                        |
|                   | Detection instrument and software        | Molecular Device ImageXpress <sup>Micro</sup> Automated High Content Analysis System                             |
|                   | Assay validation/QC                      | Standard deviation of controls and background                                                                    |
|                   | Correction factors                       | Z score=0.59                                                                                                     |
|                   | Normalization                            | None                                                                                                             |
|                   | Additional comments                      |                                                                                                                  |
| Post-HTS analysis | Hit criteria                             | The compounds that increase the percentage of INS <sup>+</sup> cells by three folds were picked as primary hits. |
|                   | Hit rate                                 | About 0.2% (8/4000)                                                                                              |
|                   | Additional assay(s)                      | Intracellular FACS to detect the percentage of insulin+ cells and c-peptide+ cells                               |
|                   | Confirmation of hit purity and structure | Compounds were repurchased from Tocris                                                                           |
|                   | Additional comments                      |                                                                                                                  |

**Supplementary Table 2. Hit compounds from primary screening.**

| Compound name       | Chemical structure                                                                  | Efficacy Curve                                                                       | Toxicity Curve                                                                        |
|---------------------|-------------------------------------------------------------------------------------|--------------------------------------------------------------------------------------|---------------------------------------------------------------------------------------|
| H1152               | 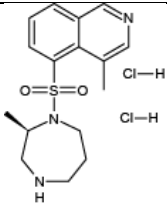   |    |    |
| BWB70C              |    |    |    |
| Chicago sky blue 6B |   |   |   |
| Genipin             |  |  |  |
| Y-27632             |  |  |  |

**Supplementary Table 3.** Related with Figure 4. Differentiation Protocol.

|               |        |                                                                                    |                                                                                                                                                                              |
|---------------|--------|------------------------------------------------------------------------------------|------------------------------------------------------------------------------------------------------------------------------------------------------------------------------|
| S1 (3 days)   | 1 Day  | MCDB131<br>1.5g /L Sodium bicarbonate<br>10 mM glucose<br>0.5% Fatty acid free BSA | 100 ng/ml activin A<br>3 $\mu$ M Chir99021                                                                                                                                   |
|               | 1 Day  | MCDB131<br>1.5 g/L Sodium bicarbonate<br>10 mM glucose<br>0.5% Fatty acid free BSA | 100 ng/mL activin A<br>0.3 $\mu$ M Chir99021                                                                                                                                 |
|               | 1 Day  | MCDB131<br>1.5g/L Sodium bicarbonate<br>10mM glucose<br>0.5% Fatty acid free BSA   | 100ng/mL activin A                                                                                                                                                           |
| S2 (2 days)   | 2 Days | MCDB131<br>1.5 g/L Sodium bicarbonate<br>10 mM glucose<br>0.5% Fatty acid free BSA | 0.25 mM ascorbic acid<br>50 ng/mL FGF7                                                                                                                                       |
| S3 (2 days)   | 2 Days | MCDB131<br>2.5 g/L Sodium bicarbonate<br>10 mM glucose<br>2% Fatty acid free BSA   | 0.25 mM ascorbic acid<br>50 ng/mL FGF7<br>0.25 $\mu$ M SANT-1<br>1 $\mu$ M retinoic acid<br>100 nM LDN193189<br>1:200 ITS-X<br>200 nM TPB                                    |
| S4 (3 days)   | 3 Days | MCDB131<br>2.5 g/L Sodium bicarbonate<br>10 mM glucose<br>2% Fatty acid free BSA   | 0.25 mM ascorbic acid<br>2 ng/mL FGF7<br>0.25 $\mu$ M SANT-1<br>0.1 $\mu$ M retinoic acid<br>100 nM LDN193189<br>1:200 ITS-X<br>200 nM TPB                                   |
| S5 (3 days)   | 3 Days | MCDB131<br>1.5 g/L Sodium bicarbonate<br>20 mM glucose<br>2% Fatty acid free BSA   | 0.25 $\mu$ M SANT-1<br>0.05 $\mu$ M retinoic acid<br>100 nM LDN193189<br>1:200 ITS-X<br>1 $\mu$ M T3<br>10 $\mu$ M ALK5i<br>10 $\mu$ M Zinc Sulfate<br>10 $\mu$ g/mL heparin |
| S6-1 (7 days) |        | MCDB131<br>1.5g/L Sodium bicarbonate<br>20mM glucose<br>2% Fatty acid free BSA     | 100 nM LDN193189<br>1:200 ITS-X<br>1 $\mu$ M T3<br>10 $\mu$ M ALK5i<br>10 $\mu$ M Zinc Sulfate                                                                               |

|                     |  |                                                                                  |                                                                                                                    |
|---------------------|--|----------------------------------------------------------------------------------|--------------------------------------------------------------------------------------------------------------------|
|                     |  |                                                                                  | 10 µg/mL heparin<br>100 nM GS inh XX                                                                               |
| S6-2<br>(7<br>days) |  | MCDB131<br>1.5 g/L Sodium bicarbonate<br>20 mM glucose<br>2% Fatty acid free BSA | 100 nM LDN193189<br>1:200 ITS-X<br>1 µM T3<br>10 µM ALK5i<br>10 µM Zinc Sulfate<br>10 µg/mL heparin<br>10 µM H1152 |

**Supplementary Table 4.** Related with Figure 2,4. Primer for qRT-PCR

| Gene                | Forward                    | Reverse                  |
|---------------------|----------------------------|--------------------------|
| <i>NKX6.1</i>       | CCGAGTCCTGCTTCTTCTTG       | ATTCGTTGGGGATGACAGAG     |
| <i>MafA</i>         | GAGTTGGCACTTCTCGCTCT       | TTCAGCAAGGAGGAGGTCA<br>T |
| <i>ABCC8</i>        | GAGAAGTCGGCCTCTTTGAA       | GGGCCTTTGCCATCTATAACC    |
| <i>UCN3</i>         | GATGGGCTTGGCTTTGTAGA       | GGAGGGAAGTCCACTCTCG      |
| <i>G6PC2</i>        | ACACTCCAAAGAAATGACCAG<br>G | CGCATCCTGTGTCTGGTATG     |
| <i>INS</i>          | GCAGCCTTTGTGAACCAACAC      | CCCCGCACACTAGGTAGAG<br>A |
| <i>KCNK1</i>        | GGCCTTACCTCCATCTGACA       | TGGAACTGGGACTTCACCTC     |
| <i>KCNK3</i>        | GAACATGCAGAACACCTTGC       | GGCTCCTTCTACTTCGCCAT     |
| <i>PAX4</i>         | GAGGGTCTGGTTTTCCAACA       | TGTGCAGAGATGATTCCTGG     |
| <i>SOX9</i>         | GTACCCGCACTTGCACAAC        | GTGGTCCTTCTTGTGCTGC      |
| <i>NKX2.2</i>       | TCTACGACAGCAGCGACAAC       | GGAGCTTGAGTCCTGAGGG      |
| <i>NEUROD<br/>1</i> | ATGACCAAATCGTACAGCGAG      | GTTTCATGGCTTCGAGGTCGT    |

**Supplementary Table 5.** Related with Figure 6. shRNA target sequences.

|          |                     |
|----------|---------------------|
| ROCKI    | TCCATTCCATGGGTTTTAT |
| ROCKII   | ATCAGACAGCATCCTTTCT |
| Scramble | GGACTACTCTAGACGTATA |
